# Supplementary material for: Cytogenetic identification and molecular marker development of a novel Wheat - Psathyrostachys huashanica 2NsS (2D) fragment disomic substitution line with resistance to stripe rust
Source: Research Square preprint supplement (doi:10.21203/rs.3.rs-4491447/v1), 2024-06-14
Supplement: Supplementary file 1 [file 37002b803bc5ad1b04b845ee.xlsx]

## Sheet: Table 1
Table 1 Wheat EST-STS and PLUG markers used in this study to successfully analyze the chromosomal composition of 18TR61
Marker	Type	Primer (5’-3’)		Location	Tm (℃)
		Forward Primer	Reverse Primer
TNAC1204	PLUG	GAGAGGAATGCGTGAAGTTTG	AGACCATCTTTCCGGTCTTTG	2AL 2BL 2DL	58
TNAC1137	PLUG	GCTGAATCACTCAACCATTCC	TGCTCGCGCTCTACTTCAC	2AL 2BL 2DL	58
TNAC1200	PLUG	GTCCGCAGAATTGCTTCCTAT	TCTTCATGCATTGAGCGATAC	2AL 2BL 2DL	58
CD453463	EST	AAAGCGAGCTCCAGAGACTG	GGATTACTGACCCCATGCAC	2AS 2DS	60
BQ160588	EST	CTACTGCGGGTTTGGTGG	GGCCAGAACAGCATCATCTT	2AS 2BS 2DS	60
BQ162235	EST	TCCAAGTCGCATGCTCTCTA	GTGATGATGAAGTTGGGGCT	2AL 2BL 2DL	60
