# Supplementary material for: Cytogenetic identification and molecular marker development of a novel Wheat - Psathyrostachys huashanica 2NsS (2D) fragment disomic substitution line with resistance to stripe rust
Source: Research Square preprint supplement (doi:10.21203/rs.3.rs-4491447/v1), 2024-06-14
Supplement: Supplementary file 2 [file 90643481bbba5aa0ff7d02f4.xlsx]

## Sheet: Table 3 
Table 3 Evaluation of agronomic traits of 18TR61 and its parents.
Material	Plant height (cm)	Tiller number	Spike length(cm)	Spikelets per spike	Kernels per spike	Thousand kernel weight (g)	Awn type
7182	79±2.54Bb	10.2±1.48Bb	11.34±0.83Bb	21.3±1.41Aa	53.5±4.74Aa	38.019±0.61Cc	Long awn
Trs-372	87.4±3.24Aa	12.2±2.20Aa	7.94±0.42Cc	15.7±1.25Dd	41.1±2.51Bb	45.884±0.57Bb	Long awn
P. huashanica	62±1.05Cc	clump	8.142±0.24Cc	16.8±1.03Cc	41.2±1.93Bb	3.495±0.29Dd	Short awn
18TR61	76.5±4.74Bb	9.6±1.35Bb	19.75±0.98Aa	20±1.41Bb	40.7±2.50Bb	47.17±0.59Aa	Long awn
Data in the columns indicate means ± standard errors. Different uppercase and lowercase letters following the means indicate significant differences at the p < 0.01 and p < 0.05 levels, respectively.
