# Supplementary material for: Cytogenetic identification and molecular marker development of a novel Wheat - Psathyrostachys huashanica 2NsS (2D) fragment disomic substitution line with resistance to stripe rust
Source: Research Square preprint supplement (doi:10.21203/rs.3.rs-4491447/v1), 2024-06-14
Supplement: Supplementary file 3 [file d18b824efdcfa920976d1363.xlsx]

## Sheet: Sheet1
Table S1 Comparison results of line 18TR61 using BWA and blast.
query id	refer id	% identity	alignment length	mismatches	gap opens	s. start	s. end	evalue	bit score
E200003583L1C025R03601506484	2Ns	100	150	0	0	14961030	14961179	2.31e-73	278
E200003583L1C034R02004979914	2Ns	100	150	0	0	23229768	23229619	2.31e-73	278
E200003583L1C040R04002905762	2Ns	100	150	0	0	38110563	38110414	2.31e-73	278
E200003583L1C034R04203198083	2Ns	100	150	0	0	38110565	38110416	2.31e-73	278
E200003583L1C012R02704873618	2Ns	100	150	0	0	44049680	44049531	2.31e-73	278
E200003583L1C006R00303490613	2Ns	100	150	0	0	81959992	81959843	2.31e-73	278
E200003583L1C011R03404812366	2Ns	100	150	0	0	81959996	81959847	2.31e-73	278
E200003583L1C026R00202341372	2Ns	100	150	0	0	105249170	105249319	2.31e-73	278
E200003583L1C035R00704894263	2Ns	100	150	0	0	107505359	107505508	2.31e-73	278
E200003583L1C021R03904010419	2Ns	100	150	0	0	107505363	107505512	2.31e-73	278
E200003583L1C003R03901382253	2Ns	100	150	0	0	107505503	107505354	2.31e-73	278
E200003583L1C013R01703385444	2Ns	100	150	0	0	148662118	148661969	2.31e-73	278
E200003583L1C022R03601017066	2Ns	100	148	0	0	44049756	44049609	2.99e-72	274
E200003583L1C040R02304280850	2Ns	100	148	0	0	382664672	382664819	2.99e-72	274
E200003583L1C033R01302662711	2Ns	99.333	150	1	0	28512190	28512339	1.08e-71	272
E200003583L1C003R00402923595	2Ns	99.333	150	1	0	38110540	38110391	1.08e-71	272
E200003583L1C011R03304588509	2Ns	99.333	150	1	0	38110573	38110424	1.08e-71	272
E200003583L1C021R02803607109	2Ns	99.333	150	1	0	38110575	38110426	1.08e-71	272
E200003583L1C027R00503852979	2Ns	99.333	150	1	0	44049505	44049654	1.08e-71	272
E200003583L1C035R00203689112	2Ns	99.333	150	1	0	55416535	55416386	1.08e-71	272
E200003583L1C033R01003410951	2Ns	99.333	150	1	0	55447752	55447901	1.08e-71	272
E200003583L1C006R01601222845	2Ns	99.333	150	1	0	107501463	107501314	1.08e-71	272
E200003583L1C012R03303339709	2Ns	99.333	150	1	0	107505487	107505338	1.08e-71	272
E200003583L1C041R03204316023	2Ns	99.333	150	1	0	107644601	107644452	1.08e-71	272
E200003583L1C028R02200456596	2Ns	99.333	150	1	0	107644637	107644488	1.08e-71	272
E200003583L1C027R00904727663	2Ns	99.333	150	1	0	107644654	107644505	1.08e-71	272
E200003583L1C018R03401849815	2Ns	99.333	150	1	0	123531775	123531924	1.08e-71	272
E200003583L1C011R02404074151	2Ns	99.333	150	1	0	127197747	127197598	1.08e-71	272
E200003583L1C025R04200577012	2Ns	99.333	150	1	0	130786463	130786314	1.08e-71	272
E200003583L1C026R02502461806	2Ns	99.333	150	1	0	148661937	148662086	1.08e-71	272
E200003583L1C035R01203505357	2Ns	99.333	150	1	0	259964161	259964310	1.08e-71	272
E200003583L1C041R02703993931	2Ns	99.333	150	1	0	282823746	282823597	1.08e-71	272
E200003583L1C036R03004950289	2Ns	99.333	150	1	0	294011888	294011739	1.08e-71	272
E200003583L1C033R01402490644	2Ns	99.333	150	1	0	360487870	360488019	1.08e-71	272
E200003583L1C016R03403887416	2Ns	99.329	149	1	0	35903924	35904072	3.87e-71	270
E200003583L1C037R03701357238	2Ns	99.329	149	1	0	127197742	127197594	3.87e-71	270
E200003583L1C027R00504759429	2Ns	99.324	148	1	0	55447884	55447737	1.39e-70	268
E200003583L1C006R04000416048	2Ns	98.684	152	0	1	107644512	107644361	1.39e-70	268
E200003583L1C012R02204115113	2Ns	98.675	151	1	1	405904094	405904244	5.01e-70	267
E200003583L1C001R01200694453	2Ns	98.667	150	2	0	127197385	127197534	5.01e-70	267
E200003583L1C020R02801649914	2Ns	98.667	150	2	0	127197791	127197642	5.01e-70	267
E200003583L1C029R02603855581	2Ns	98.667	150	2	0	15211328	15211179	5.01e-70	267
E200003583L1C016R02100775784	2Ns	98.667	150	2	0	164029487	164029338	5.01e-70	267
E200003583L1C032R04201590761	2Ns	98.667	150	2	0	34770405	34770256	5.01e-70	267
E200003583L1C012R01801537849	2Ns	98.667	150	2	0	3955943	3956092	5.01e-70	267
E200003583L1C038R02703975389	2Ns	98.667	150	2	0	3955980	3956129	5.01e-70	267
E200003583L1C017R01304304021	2Ns	98.667	150	2	0	3956016	3956165	5.01e-70	267
E200003583L1C014R03204207247	2Ns	98.667	150	2	0	14526295	14526146	5.01e-70	267
E200003583L1C022R01500639367	2Ns	98.667	150	2	0	15205331	15205182	5.01e-70	267
E200003583L1C019R00601885114	2Ns	98.667	150	2	0	17351852	17352001	5.01e-70	267
E200003583L1C012R00903699721	2Ns	98.667	150	2	0	21222173	21222322	5.01e-70	267
E200003583L1C034R02101160048	2Ns	98.667	150	2	0	23070185	23070334	5.01e-70	267
E200003583L1C023R00401267008	2Ns	98.667	150	2	0	23224455	23224604	5.01e-70	267
E200003583L1C006R04001983752	2Ns	98.667	150	2	0	42716061	42716210	5.01e-70	267
E200003583L1C014R01303100151	2Ns	98.667	150	2	0	44049803	44049952	5.01e-70	267
E200003583L1C041R04002982391	2Ns	98.667	150	2	0	105249778	105249927	5.01e-70	267
E200003583L1C006R00300335531	2Ns	98.667	150	2	0	107023787	107023638	5.01e-70	267
E200003583L1C036R00604047890	2Ns	98.667	150	2	0	107505280	107505429	5.01e-70	267
E200003583L1C029R01701922413	2Ns	98.667	150	2	0	107505289	107505438	5.01e-70	267
E200003583L1C023R03400705170	2Ns	98.667	150	2	0	107505313	107505462	5.01e-70	267
E200003583L1C039R00201171593	2Ns	98.667	150	2	0	107505318	107505467	5.01e-70	267
E200003583L1C029R03604145256	2Ns	98.667	150	2	0	107505401	107505550	5.01e-70	267
E200003583L1C034R02903788740	2Ns	98.667	150	2	0	107505415	107505564	5.01e-70	267
E200003583L1C038R00902756198	2Ns	98.667	150	2	0	107505421	107505570	5.01e-70	267
E200003583L1C011R01903113885	2Ns	98.667	150	2	0	107505435	107505584	5.01e-70	267
E200003583L1C027R01200653098	2Ns	98.667	150	2	0	107505480	107505331	5.01e-70	267
E200003583L1C025R01703307309	2Ns	98.667	150	2	0	107505562	107505413	5.01e-70	267
E200003583L1C005R02604412509	2Ns	98.667	150	2	0	107505788	107505639	5.01e-70	267
E200003583L1C039R02800544778	2Ns	98.667	150	2	0	107644149	107644298	5.01e-70	267
E200003583L1C021R01804391562	2Ns	98.667	150	2	0	110610783	110610634	5.01e-70	267
E200003583L1C038R01601353244	2Ns	98.667	150	2	0	127197364	127197513	5.01e-70	267
E200003583L1C015R03204525717	2Ns	98.667	150	2	0	127197774	127197625	5.01e-70	267
E200003583L1C011R02601179149	2Ns	98.667	150	2	0	128495881	128495732	5.01e-70	267
E200003583L1C041R01800662883	2Ns	98.667	150	2	0	144206094	144205945	5.01e-70	267
E200003583L1C034R02102940344	2Ns	98.667	150	2	0	144206098	144205949	5.01e-70	267
E200003583L1C012R03904443646	2Ns	98.667	150	2	0	149737534	149737385	5.01e-70	267
E200003583L1C031R00202517402	2Ns	98.667	150	2	0	164196582	164196731	5.01e-70	267
E200003583L1C029R01702293257	2Ns	98.667	150	2	0	199891283	199891432	5.01e-70	267
E200003583L1C010R00904397669	2Ns	98.667	150	2	0	199891302	199891451	5.01e-70	267
E200003583L1C026R01604779087	2Ns	98.667	150	2	0	199891302	199891451	5.01e-70	267
E200003583L1C032R02200663247	2Ns	98.667	150	2	0	199891533	199891384	5.01e-70	267
E200003583L1C025R03901443362	2Ns	98.667	150	2	0	228093002	228092853	5.01e-70	267
E200003583L1C001R03101996739	2Ns	98.667	150	2	0	229304539	229304390	5.01e-70	267
E200003583L1C041R02401733556	2Ns	98.667	150	2	0	259060272	259060123	5.01e-70	267
E200003583L1C003R03204177830	2Ns	98.667	150	2	0	302163667	302163518	5.01e-70	267
E200003583L1C042R03300269462	2Ns	98.667	150	2	0	360102668	360102817	5.01e-70	267
E200003583L1C032R00200368834	2Ns	98.667	150	2	0	360102671	360102820	5.01e-70	267
E200003583L1C037R02603973530	2Ns	98.667	150	2	0	360102712	360102861	5.01e-70	267
E200003583L1C009R04200912654	2Ns	98.667	150	2	0	360102828	360102679	5.01e-70	267
E200003583L1C022R03403284433	2Ns	98.667	150	1	1	405904303	405904154	1.8e-69	265
E200003583L1C041R01203182080	2Ns	98.658	149	2	0	127197361	127197509	1.8e-69	265
E200003583L1C040R00702439078	2Ns	98.658	149	2	0	225283166	225283314	1.8e-69	265
E200003583L1C018R02403482884	2Ns	98.658	149	1	1	192295958	192296106	6.48e-69	263
E200003583L1C006R01003911105	2Ns	98.649	148	2	0	23726157	23726010	6.48e-69	263
E200003583L1C039R03700185184	2Ns	98.649	148	2	0	39087410	39087263	6.48e-69	263
E200003583L1C030R02801494774	2Ns	98.649	148	2	0	107650008	107649861	6.48e-69	263
E200003583L1C005R04202869551	2Ns	98.649	148	2	0	127197419	127197566	6.48e-69	263
E200003583L1C025R04001834687	2Ns	98.649	148	2	0	128495886	128495739	6.48e-69	263
E200003583L1C022R01404013297	2Ns	98.649	148	2	0	175756862	175756715	6.48e-69	263
E200003583L1C039R01901959423	2Ns	98.649	148	2	0	199890622	199890769	6.48e-69	263
E200003583L1C008R03501967357	2Ns	98.026	152	1	1	107644479	107644328	6.48e-69	263
E200003583L1C034R03704223598	2Ns	98.026	152	1	1	39033738	39033587	6.48e-69	263
E200003583L1C041R02100345430	2Ns	98.026	152	1	1	81959550	81959701	6.48e-69	263
E200003583L1C028R02003495710	2Ns	98.026	152	1	1	107644483	107644332	6.48e-69	263
E200003583L1C033R03402317268	2Ns	98.026	152	1	1	107644495	107644344	6.48e-69	263
E200003583L1C030R04004659707	2Ns	98.639	147	2	0	70824627	70824481	2.33e-68	261
E200003583L1C034R01000971625	2Ns	98.639	147	2	0	336974952	336974806	2.33e-68	261
E200003583L1C017R03701299958	2Ns	98.013	151	2	1	55394868	55395018	2.33e-68	261
E200003583L1C029R02404190221	2Ns	98.013	151	2	1	405904348	405904198	2.33e-68	261
E200003583L1C025R04204938230	2Ns	98.013	151	2	1	228336279	228336429	2.33e-68	261
E200003583L1C006R02503342841	2Ns	98.013	151	2	1	405904131	405904281	2.33e-68	261
E200003583L1C022R02600781310	2Ns	98.013	151	2	1	405904166	405904316	2.33e-68	261
E200003583L1C015R02204779840	2Ns	98.013	151	2	1	405904205	405904355	2.33e-68	261
E200003583L1C020R03001054902	2Ns	98	150	3	0	205251679	205251828	2.33e-68	261
E200003583L1C001R00700300023	2Ns	98	150	3	0	127197349	127197498	2.33e-68	261
E200003583L1C002R00203107197	2Ns	98	150	3	0	124357435	124357584	2.33e-68	261
E200003583L1C006R02303279506	2Ns	98	150	3	0	64190972	64190823	2.33e-68	261
E200003583L1C005R04003911543	2Ns	98	150	3	0	216482972	216482823	2.33e-68	261
E200003583L1C033R03801657955	2Ns	98	150	3	0	235952636	235952487	2.33e-68	261
E200003583L1C013R02300223965	2Ns	98	150	3	0	7433901	7433752	2.33e-68	261
E200003583L1C002R03304522925	2Ns	98	150	3	0	14363860	14363711	2.33e-68	261
E200003583L1C038R01300465363	2Ns	98	150	3	0	14363862	14363713	2.33e-68	261
E200003583L1C032R03402353184	2Ns	98	150	3	0	23070181	23070330	2.33e-68	261
E200003583L1C023R00603550646	2Ns	98	150	3	0	38367866	38368015	2.33e-68	261
E200003583L1C036R01903649562	2Ns	98	150	3	0	39087236	39087087	2.33e-68	261
E200003583L1C018R01903253131	2Ns	98	150	3	0	55423014	55423163	2.33e-68	261
E200003583L1C020R00101313302	2Ns	98	150	3	0	55423025	55423174	2.33e-68	261
E200003583L1C007R04204942616	2Ns	98	150	3	0	70824459	70824608	2.33e-68	261
E200003583L1C009R02701069364	2Ns	98	150	3	0	70824636	70824487	2.33e-68	261
E200003583L1C030R01600204246	2Ns	98	150	3	0	70824638	70824489	2.33e-68	261
E200003583L1C002R00904625963	2Ns	98	150	3	0	81960064	81959915	2.33e-68	261
E200003583L1C022R02401735307	2Ns	98	150	3	0	85717808	85717659	2.33e-68	261
E200003583L1C034R02203193520	2Ns	98	150	3	0	85717828	85717679	2.33e-68	261
E200003583L1C023R04002036869	2Ns	98	150	3	0	85717872	85717723	2.33e-68	261
E200003583L1C035R02802430361	2Ns	98	150	3	0	107501109	107501258	2.33e-68	261
E200003583L1C027R03604204773	2Ns	98	150	3	0	107501112	107501261	2.33e-68	261
E200003583L1C037R01702269200	2Ns	98	150	3	0	107501266	107501117	2.33e-68	261
E200003583L1C009R03300439504	2Ns	98	150	3	0	107501281	107501132	2.33e-68	261
E200003583L1C016R01303227852	2Ns	98	150	3	0	107505480	107505331	2.33e-68	261
E200003583L1C035R03100481810	2Ns	98	150	3	0	107644134	107644283	2.33e-68	261
E200003583L1C002R02804205079	2Ns	98	150	3	0	107650265	107650116	2.33e-68	261
E200003583L1C001R01000030407	2Ns	98	150	3	0	107650299	107650150	2.33e-68	261
E200003583L1C027R04100883280	2Ns	98	150	3	0	124357430	124357579	2.33e-68	261
E200003583L1C024R03800174163	2Ns	98	150	3	0	127197350	127197499	2.33e-68	261
E200003583L1C008R02005029582	2Ns	98	150	3	0	127197385	127197534	2.33e-68	261
E200003583L1C032R01100224228	2Ns	98	150	3	0	128495699	128495848	2.33e-68	261
E200003583L1C030R01904686075	2Ns	98	150	3	0	162662794	162662943	2.33e-68	261
E200003583L1C024R02101588457	2Ns	98	150	3	0	164029487	164029338	2.33e-68	261
E200003583L1C006R00702998295	2Ns	98	150	3	0	193169340	193169191	2.33e-68	261
E200003583L1C022R02702795299	2Ns	98	150	3	0	193169342	193169193	2.33e-68	261
E200003583L1C024R00803669893	2Ns	98	150	3	0	216482969	216482820	2.33e-68	261
E200003583L1C033R03304956773	2Ns	98	150	3	0	216482974	216482825	2.33e-68	261
E200003583L1C039R03000720818	2Ns	98	150	3	0	216482982	216482833	2.33e-68	261
E200003583L1C030R03600809872	2Ns	98	150	3	0	225283329	225283180	2.33e-68	261
E200003583L1C033R01104378371	2Ns	98	150	3	0	360102660	360102809	2.33e-68	261
E200003583L1C022R02401726596	2Ns	98	150	1	2	85957700	85957552	8.38e-68	259
E200003583L1C008R00802079325	2Ns	97.987	149	3	0	22590377	22590525	8.38e-68	259
E200003583L1C021R04203169468	2Ns	97.987	149	3	0	127197296	127197444	8.38e-68	259
E200003583L1C041R03502763956	2Ns	97.987	149	3	0	163913185	163913037	8.38e-68	259
E200003583L1C032R00404561978	2Ns	98.621	145	2	0	22640856	22640712	3.02e-67	257
E200003583L1C017R00800307488	2Ns	98.621	145	2	0	78775445	78775301	3.02e-67	257
E200003583L1C039R02303057643	2Ns	97.973	148	3	0	149370911	149370764	3.02e-67	257
E200003583L1C031R00404008376	2Ns	97.973	148	3	0	56001312	56001165	3.02e-67	257
E200003583L1C027R01201022801	2Ns	97.973	148	3	0	43376403	43376550	3.02e-67	257
E200003583L1C020R00801065196	2Ns	97.973	148	3	0	70824614	70824467	3.02e-67	257
E200003583L1C033R03102433681	2Ns	97.973	148	3	0	107625464	107625611	3.02e-67	257
E200003583L1C014R00803785459	2Ns	97.973	148	3	0	128495886	128495739	3.02e-67	257
E200003583L1C009R01601348964	2Ns	97.973	148	3	0	146427103	146427250	3.02e-67	257
E200003583L1C008R03002981527	2Ns	97.973	148	3	0	203152684	203152831	3.02e-67	257
E200003583L1C040R00100620386	2Ns	97.368	152	2	1	107644469	107644318	3.02e-67	257
E200003583L1C008R01601637556	2Ns	97.368	152	2	2	259964217	259964368	3.02e-67	257
E200003583L1C009R00404558821	2Ns	97.973	148	2	1	241468870	241468724	1.08e-66	255
E200003583L1C014R03600522230	2Ns	97.351	151	3	1	159816841	159816991	1.08e-66	255
E200003583L1C029R01704045613	2Ns	97.351	151	3	1	405904365	405904215	1.08e-66	255
E200003583L1C001R02401692422	2Ns	97.333	150	4	0	107501398	107501249	1.08e-66	255
E200003583L1C015R03004246450	2Ns	97.333	150	4	0	22640582	22640731	1.08e-66	255
E200003583L1C032R03803967955	2Ns	97.333	150	4	0	14363656	14363805	1.08e-66	255
E200003583L1C021R01204426049	2Ns	97.333	150	4	0	290022998	290023147	1.08e-66	255
E200003583L1C034R03703319629	2Ns	97.333	150	4	0	106885368	106885517	1.08e-66	255
E200003583L1C034R02400864125	2Ns	97.333	150	4	0	15145892	15145743	1.08e-66	255
E200003583L1C020R00600024547	2Ns	97.333	150	4	0	85717894	85717745	1.08e-66	255
E200003583L1C010R01303633266	2Ns	97.333	150	4	0	259148451	259148302	1.08e-66	255
E200003583L1C028R03703196722	2Ns	97.333	150	4	0	2000391	2000242	1.08e-66	255
E200003583L1C038R01604430931	2Ns	97.333	150	4	0	3169616	3169467	1.08e-66	255
E200003583L1C042R00803777282	2Ns	97.333	150	4	0	14490293	14490442	1.08e-66	255
E200003583L1C038R03601559132	2Ns	97.333	150	4	0	15145724	15145873	1.08e-66	255
E200003583L1C014R00504598264	2Ns	97.333	150	4	0	15145725	15145874	1.08e-66	255
E200003583L1C025R03103770281	2Ns	97.333	150	4	0	15145727	15145876	1.08e-66	255
E200003583L1C026R02802389018	2Ns	97.333	150	4	0	15145746	15145895	1.08e-66	255
E200003583L1C039R04104417356	2Ns	97.333	150	4	0	15145760	15145909	1.08e-66	255
E200003583L1C028R03004730989	2Ns	97.333	150	4	0	15145769	15145918	1.08e-66	255
E200003583L1C004R00502295813	2Ns	97.333	150	4	0	15470986	15470837	1.08e-66	255
E200003583L1C001R03402120971	2Ns	97.333	150	4	0	20386417	20386268	1.08e-66	255
E200003583L1C025R03701205145	2Ns	97.333	150	4	0	22590713	22590564	1.08e-66	255
E200003583L1C023R01305045982	2Ns	97.333	150	4	0	22590726	22590577	1.08e-66	255
E200003583L1C042R03002313930	2Ns	97.333	150	4	0	36001892	36001743	1.08e-66	255
E200003583L1C003R00801403397	2Ns	97.333	150	4	0	38110533	38110384	1.08e-66	255
E200003583L1C024R04203442372	2Ns	97.333	150	4	0	38367902	38368051	1.08e-66	255
E200003583L1C038R03902301245	2Ns	97.333	150	4	0	38367902	38368051	1.08e-66	255
E200003583L1C033R03000181380	2Ns	97.333	150	4	0	55417375	55417226	1.08e-66	255
E200003583L1C021R03303099656	2Ns	97.333	150	4	0	66464904	66464755	1.08e-66	255
E200003583L1C037R01002998840	2Ns	97.333	150	4	0	70824470	70824619	1.08e-66	255
E200003583L1C015R00100275904	2Ns	97.333	150	4	0	78408198	78408347	1.08e-66	255
E200003583L1C006R01000737577	2Ns	97.333	150	4	0	78408201	78408350	1.08e-66	255
E200003583L1C026R01904767064	2Ns	97.333	150	4	0	85600276	85600425	1.08e-66	255
E200003583L1C008R02104735492	2Ns	97.333	150	4	0	85600290	85600439	1.08e-66	255
E200003583L1C038R02003806674	2Ns	97.333	150	4	0	85717925	85717776	1.08e-66	255
E200003583L1C030R03103249887	2Ns	97.333	150	4	0	85732217	85732366	1.08e-66	255
E200003583L1C011R01101011662	2Ns	97.333	150	4	0	107501307	107501158	1.08e-66	255
E200003583L1C014R01000519721	2Ns	97.333	150	4	0	107501317	107501168	1.08e-66	255
E200003583L1C015R03901719772	2Ns	97.333	150	4	0	107501323	107501174	1.08e-66	255
E200003583L1C036R02102305893	2Ns	97.333	150	4	0	107501344	107501195	1.08e-66	255
E200003583L1C003R02203625834	2Ns	97.333	150	4	0	107501347	107501198	1.08e-66	255
E200003583L1C024R01403898656	2Ns	97.333	150	4	0	107501357	107501208	1.08e-66	255
E200003583L1C039R00501982070	2Ns	97.333	150	4	0	107644280	107644131	1.08e-66	255
E200003583L1C024R00104463340	2Ns	97.333	150	4	0	119288630	119288779	1.08e-66	255
E200003583L1C041R03104030337	2Ns	97.333	150	4	0	127197428	127197577	1.08e-66	255
E200003583L1C036R00103867424	2Ns	97.333	150	4	0	127197509	127197658	1.08e-66	255
E200003583L1C007R00901178275	2Ns	97.333	150	4	0	127197650	127197501	1.08e-66	255
E200003583L1C041R00804274676	2Ns	97.333	150	4	0	127197876	127197727	1.08e-66	255
E200003583L1C027R02402421976	2Ns	97.333	150	4	0	134197077	134197226	1.08e-66	255
E200003583L1C024R01804333563	2Ns	97.333	150	4	0	138959477	138959328	1.08e-66	255
E200003583L1C041R01300018537	2Ns	97.333	150	4	0	202748775	202748924	1.08e-66	255
E200003583L1C029R02900780766	2Ns	97.333	150	4	0	216483035	216482886	1.08e-66	255
E200003583L1C014R04005009831	2Ns	97.333	150	4	0	224905252	224905103	1.08e-66	255
E200003583L1C002R02804794328	2Ns	97.333	150	4	0	224905256	224905107	1.08e-66	255
E200003583L1C042R03900315621	2Ns	97.333	150	4	0	224905256	224905107	1.08e-66	255
E200003583L1C033R01202903789	2Ns	97.333	150	4	0	239807300	239807151	1.08e-66	255
E200003583L1C007R00403457029	2Ns	97.333	150	4	0	250278444	250278593	1.08e-66	255
E200003583L1C041R03800359170	2Ns	97.333	150	4	0	250285419	250285270	1.08e-66	255
E200003583L1C023R04000602659	2Ns	97.333	150	4	0	250285422	250285273	1.08e-66	255
E200003583L1C028R04103511969	2Ns	97.333	150	4	0	259148454	259148305	1.08e-66	255
E200003583L1C030R03202188605	2Ns	97.333	150	4	0	289353782	289353931	1.08e-66	255
E200003583L1C030R00304599579	2Ns	97.333	150	4	0	290023135	290022986	1.08e-66	255
E200003583L1C022R00803071841	2Ns	97.333	150	4	0	302749425	302749574	1.08e-66	255
E200003583L1C004R03000202448	2Ns	97.333	150	4	0	328664918	328664769	1.08e-66	255
E200003583L1C015R02800695163	2Ns	97.333	150	4	0	360102646	360102795	1.08e-66	255
E200003583L1C040R01500148972	2Ns	97.333	150	3	1	190851764	190851912	3.9e-66	254
E200003583L1C015R02202978034	2Ns	97.333	150	3	1	199891139	199891287	3.9e-66	254
E200003583L1C004R02302438287	2Ns	97.333	150	3	1	316931190	316931042	3.9e-66	254
E200003583L1C005R02900430834	2Ns	97.333	150	3	1	405904237	405904385	3.9e-66	254
E200003583L1C030R03302425119	2Ns	97.315	149	4	0	14526353	14526205	3.9e-66	254
E200003583L1C034R01602387354	2Ns	97.315	149	4	0	22242395	22242543	3.9e-66	254
E200003583L1C013R02202447744	2Ns	97.315	149	4	0	99346632	99346780	3.9e-66	254
E200003583L1C032R01802101152	2Ns	97.315	149	4	0	117646136	117646284	3.9e-66	254
E200003583L1C041R03603303651	2Ns	97.315	149	4	0	194839388	194839536	3.9e-66	254
E200003583L1C030R03900295372	2Ns	97.315	149	4	0	216483000	216482852	3.9e-66	254
E200003583L1C017R01600627935	2Ns	97.315	149	4	0	224905296	224905148	3.9e-66	254
E200003583L1C020R04204204125	2Ns	97.931	145	3	0	215620971	215621115	1.4e-65	252
E200003583L1C025R03001577080	2Ns	97.315	149	3	1	16781161	16781014	1.4e-65	252
E200003583L1C034R03404006018	2Ns	97.297	148	4	0	2000235	2000382	1.4e-65	252
E200003583L1C012R02503390947	2Ns	97.297	148	4	0	53945050	53945197	1.4e-65	252
E200003583L1C033R02301532283	2Ns	97.297	148	4	0	193169241	193169388	1.4e-65	252
E200003583L1C021R03702464441	2Ns	97.297	148	4	0	312152170	312152317	1.4e-65	252
E200003583L1C016R03101449167	2Ns	97.297	148	4	0	360102632	360102779	1.4e-65	252
E200003583L1C022R02000371232	2Ns	96.711	152	3	1	302163440	302163591	1.4e-65	252
E200003583L1C028R03604484986	2Ns	96.711	152	3	1	3956368	3956217	1.4e-65	252
E200003583L1C019R03702442087	2Ns	96.711	152	3	1	39087386	39087235	1.4e-65	252
E200003583L1C009R02801419566	2Ns	96.667	150	5	0	52427352	52427501	1.4e-65	252

## Sheet: Sheet2
query id: Query Serial ID Identification
refer id: Reference Sequence ID Identification
identity (%): Percentage of consistency in sequence matching
alignment length: Length of comparison area eligible for comparison
mismatches: Number of mismatches in the comparison region
gap openings: Number of gaps in the comparison region
s.start: Comparison of the start site of the region on the reference sequence (refer id)
s.end: Comparison of the end site of the region on the reference sequence (refer id)
e-value: The expected value of the comparison result, which randomly disorganizes and recombines the comparison sequences and compares them with the database, and the lower the value if the function is more conservative
bit score: The bit score value of the comparison result
