# Supplementary material for: Cytogenetic identification and molecular marker development of a novel Wheat - Psathyrostachys huashanica 2NsS (2D) fragment disomic substitution line with resistance to stripe rust
Source: Research Square preprint supplement (doi:10.21203/rs.3.rs-4491447/v1), 2024-06-14
Supplement: Supplementary file 4 [file fd7d74ec6e004baeda6d2140.xlsx]

## Sheet: Table 2
Table 2 P. huashanica 2Ns chromosome-specific markers information developed from 18TR61 sequencing data
Marker	Species							Primer (5’-3’)		Tm (℃)	PCR products (bp)
	7182	Trs-372	S. cereale	Th. ponticum	P. huashanica	L. mollis	18TR61	Forward Primer	Reverse Primer
Ph#2Ns-1	–	–	–	–	+	+	+	CTTCATCTTCCTCTGTCATCTG	TTCTGGTGGACAAACAAACTC	58℃	123bp
Ph#2Ns-40	–	–	–	–	+	+	+	GTTTAGTTTCCCAACCACCC	GTCAAAGGACGATTGGGATT	62℃	112bp
Ph#2Ns-41	–	–	–	–	+	–	+	TGTCAAAGGACGATTGGGAT	TTTAGTTTCCCAACCACCCT	58℃	112bp
Ph#2Ns-42	–	–	–	–	+	+	+	TGCTACATTGGTGTGTTTGA	GAGTGTGAGATTAGTGCCGT	60℃	116bp
Ph#2Ns-43	–	–	–	–	+	+	+	TAACCACACCAACATCATCC	TTGCTATGCTCAGGAGGACG	60℃	116bp
Ph#2Ns-44	–	–	–	–	+	+	–	GAAGCCGACGACTGCCTAAC	CAATCTGGGCTGTTTCGGAG	58℃	122bp
Ph#2Ns-93	+	+	+	+	+	+	+	GGGCATAGTTGACTGGGAAA	CGACTGGCTAACTAAGCACCT	58℃	138bp
Ph#2Ns-101	–	–	–	–	+	–	+	CTGAAGTATCTGTTCGGCTG	AGAATGTCTTCGGTGGTAAA	58℃	136bp
Ph#2Ns-106	–	–	–	–	+	+	+	AACGGTGCTGTGGTCCTATT	CCTTCAAACATCTCATCATCAGC	56℃	137bp
Ph#2Ns-108	–	–	–	–	+	+	+	ACGGCACGGAAGGCTAATACT	CGGTGTGTGCTCGTTGTGCT	62℃	114bp
Ph#2Ns-109	–	–	–	–	+	+	+	CACACACGGATGAAGGAGAG	CAAAAACCAAAGAAGAAAAAGC	58℃	132bp
Ph#2Ns-114	–	–	+	+	+	+	+	TTTTGAGTGGTTGGAAGTGC	AACTCGTCCCATTCTTCCTC	58℃	112bp
Ph#2Ns-115	–	–	–	+	+	+	+	GATGCCCTCGCTGTCTATG	TGACAGTGAGAGAAGCAGCG	62℃	122bp
Ph#2Ns-116	+	+	+	+	+	+	+	ACTCGGACCCTGTCTTATTG	ATACAAGCAGAGATGCGAATA	56℃	125bp
Ph#2Ns-117	–	–	–	–	+	+	+	GGCACTTCGGGAGGTGTCTT	TAATCGGTCTTCTGAGCGGG	60℃	128bp
Ph#2Ns-118	–	–	–	+	+	+	+	ACTGGCTCCCACTTGATGAT	CTGAAGTGTGGTGTGGTTGG	62℃	134bp
Ph#2Ns-119	–	–	–	+	+	+	+	CGTAGTAGAACGGTGTCCAA	AGTGGGTAGAGCAGATGTGG	62℃	136bp
Ph#2Ns-162	–	–	+	–	+	+	+	ACCAATGAAATGGGGAGTGA	AGGTTTACCACGGTTGCTGT	58℃	120bp
Ph#2Ns-163	+	–	+	+	+	+	+	AAACAACTTTTGACTGCTGG	ACCGAAAGATGTGTCAAGAT	56℃	128bp
Ph#2Ns-172	–	–	–	–	+	+	+	TCGTAAATCACTTCCTTCCG	TAACCATAGGGTAGGCAGGC	60℃	144bp
Ph#2Ns-175	–	–	–	–	+	–	+	AGCATCTTTACCACCGAACA	CGTCTTGGTTCTGGCTATTC	58℃	116bp
Ph#2Ns-176	–	–	–	+	+	+	+	CTGAGTGTTACTTGTGGGCT	CGCAAACTAAAATGTTCTTG	56℃	120bp
Ph#2Ns-177	–	–	–	–	+	+	+	GACGGAACTCATTGTCTCAT	GCATCTGAAAGTGAGAGGTG	60℃	124bp
Ph#2Ns-178	–	–	–	–	+	–	+	TATTTATGTTATGTTCGGGG	TCAGGAGGGTATCTACTTGC	58℃	128bp
Ph#2Ns-179	–	–	–	+	+	+	+	ACCACAACGGAACTCTACGA	CTTTGGGTAGGGTCCTTGTT	60℃	130bp
Ph#2Ns-180	+	+	+	+	+	+	+	CAAAAGCCACTCCTAAAAAC	CAGATGAGGATGAAGACGGT	58℃	132bp
Ph#2Ns-181	–	–	–	+	+	+	+	CCATTTTTGACCGATTTTGC	CTTCTTCCATTCCCGTTTTG	58℃	140bp
Ph#2Ns-182	+	–	+	+	+	+	+	CCGTGAACATCAACGACTAC	GCTGATGGCTTCATTGTTTA	58℃	142bp
Ph#2Ns-256	+	–	–	+	+	+	+	CAGAACACTCCAGAGGGCTA	TGAAGCATTACGACAACGAC	60℃	120bp
Ph#2Ns-259	–	–	–	–	+	+	+	ACCATAGCAAAAAATAACCG	CTATTGACTCTGCTGTTGGG	58℃	140bp
Note: "+" indicates the presence of a target-specific band; "–" indicates the absence of a target-specific band.
